# Supplementary material
Source: PubMed Central journal article supplement (PMC10859913)
Supplement: NIHMS1958435-supplement-Supplementary_Figures.pdf [file NIHMS1958435-supplement-Supplementary_Figures.pdf]

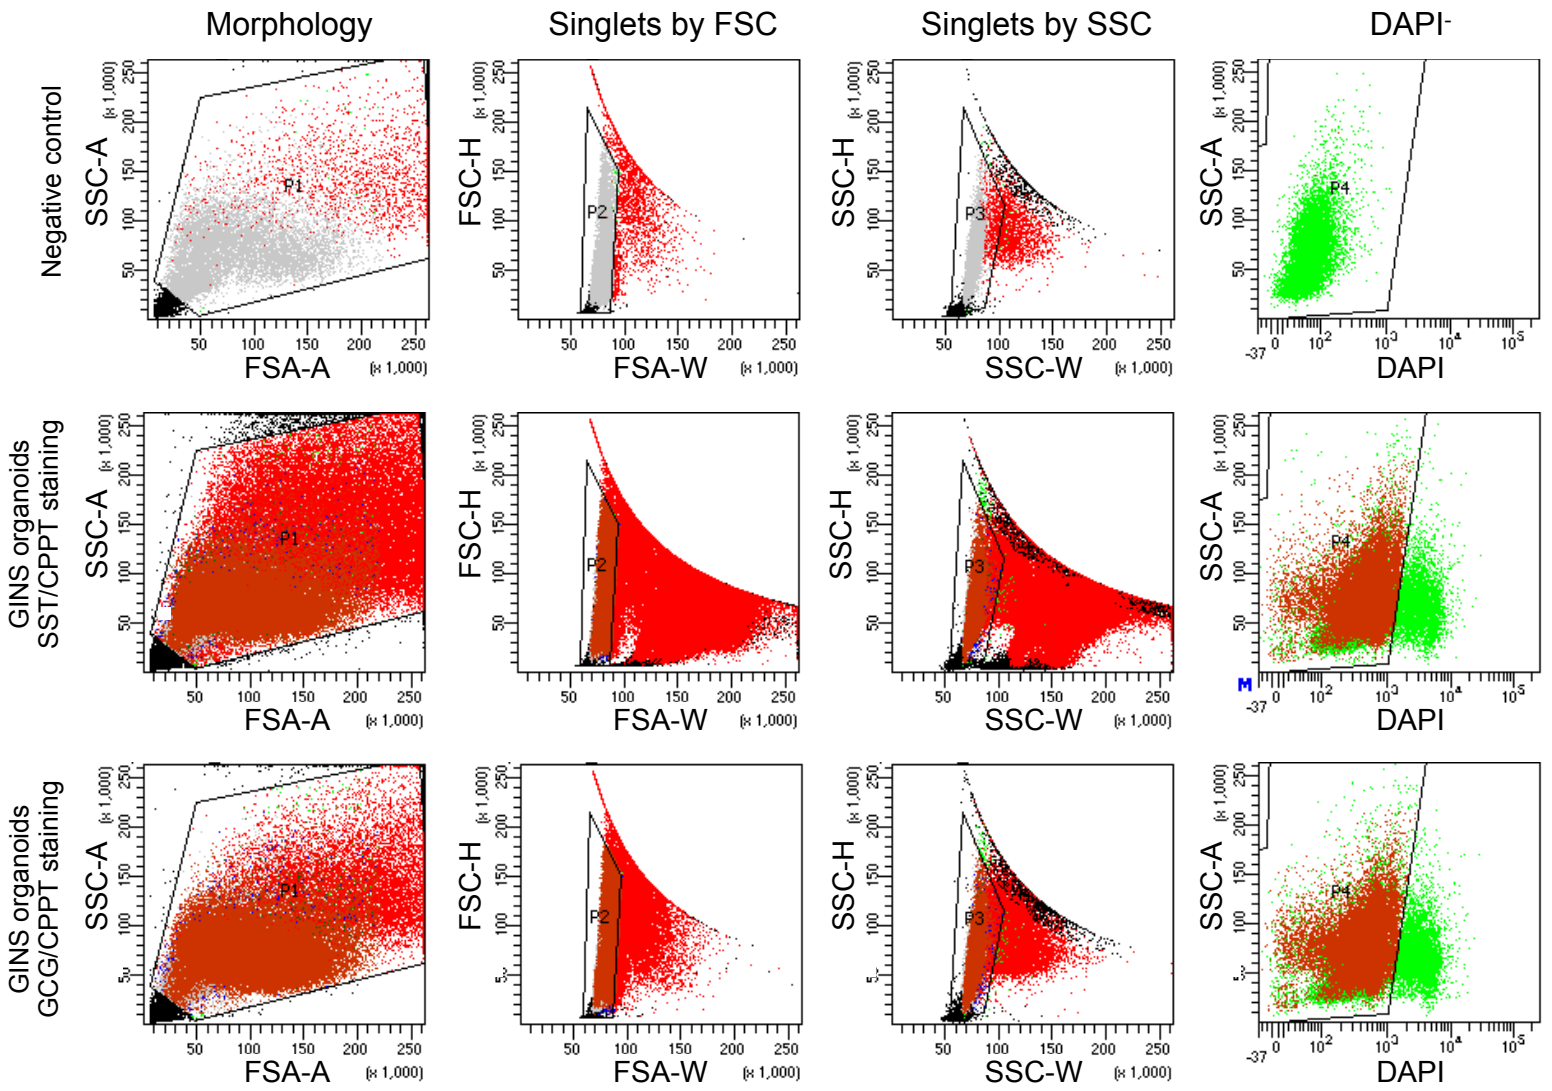

Supplementary Fig. 1 | Flow cytometry gating strategy for GINS organoids.

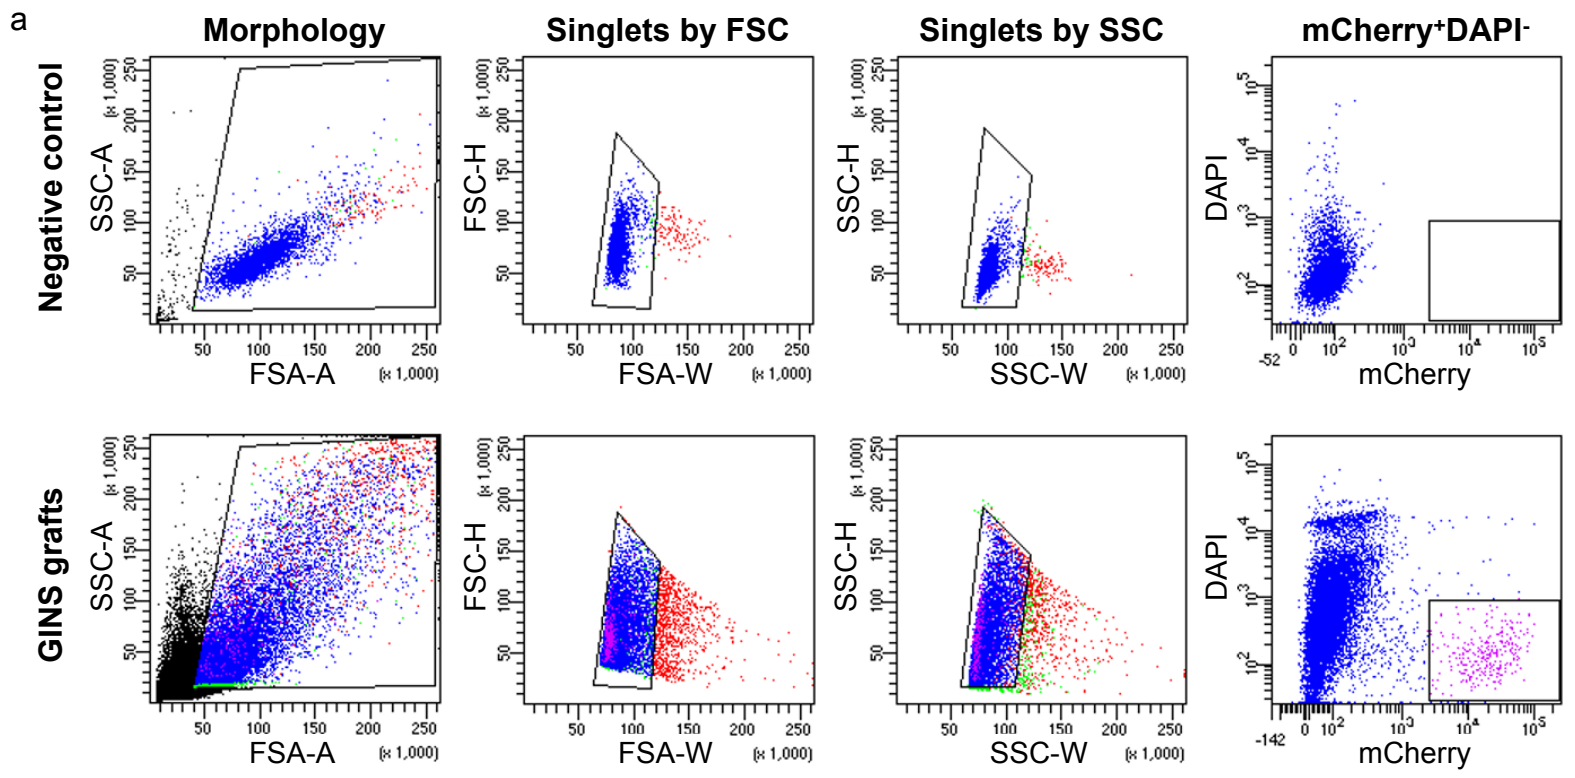

**b** GINS grafts statistics

| Population     | %Parent | %Total |
|----------------|---------|--------|
| All Events     | ####    | 100.0  |
| Morphology     | 22.2    | 22.2   |
| Singlets FSC   | 93.8    | 20.8   |
| Singlets SSC   | 89.7    | 18.7   |
| DAPI- mCherry+ | 2.1     | 0.4    |

**Supplementary Fig. 2 | Flow cytometry gating strategy for GINS grafts. a**, Sorting for mCherry+DAPI- cells. **b**, Percentage of cell populations.

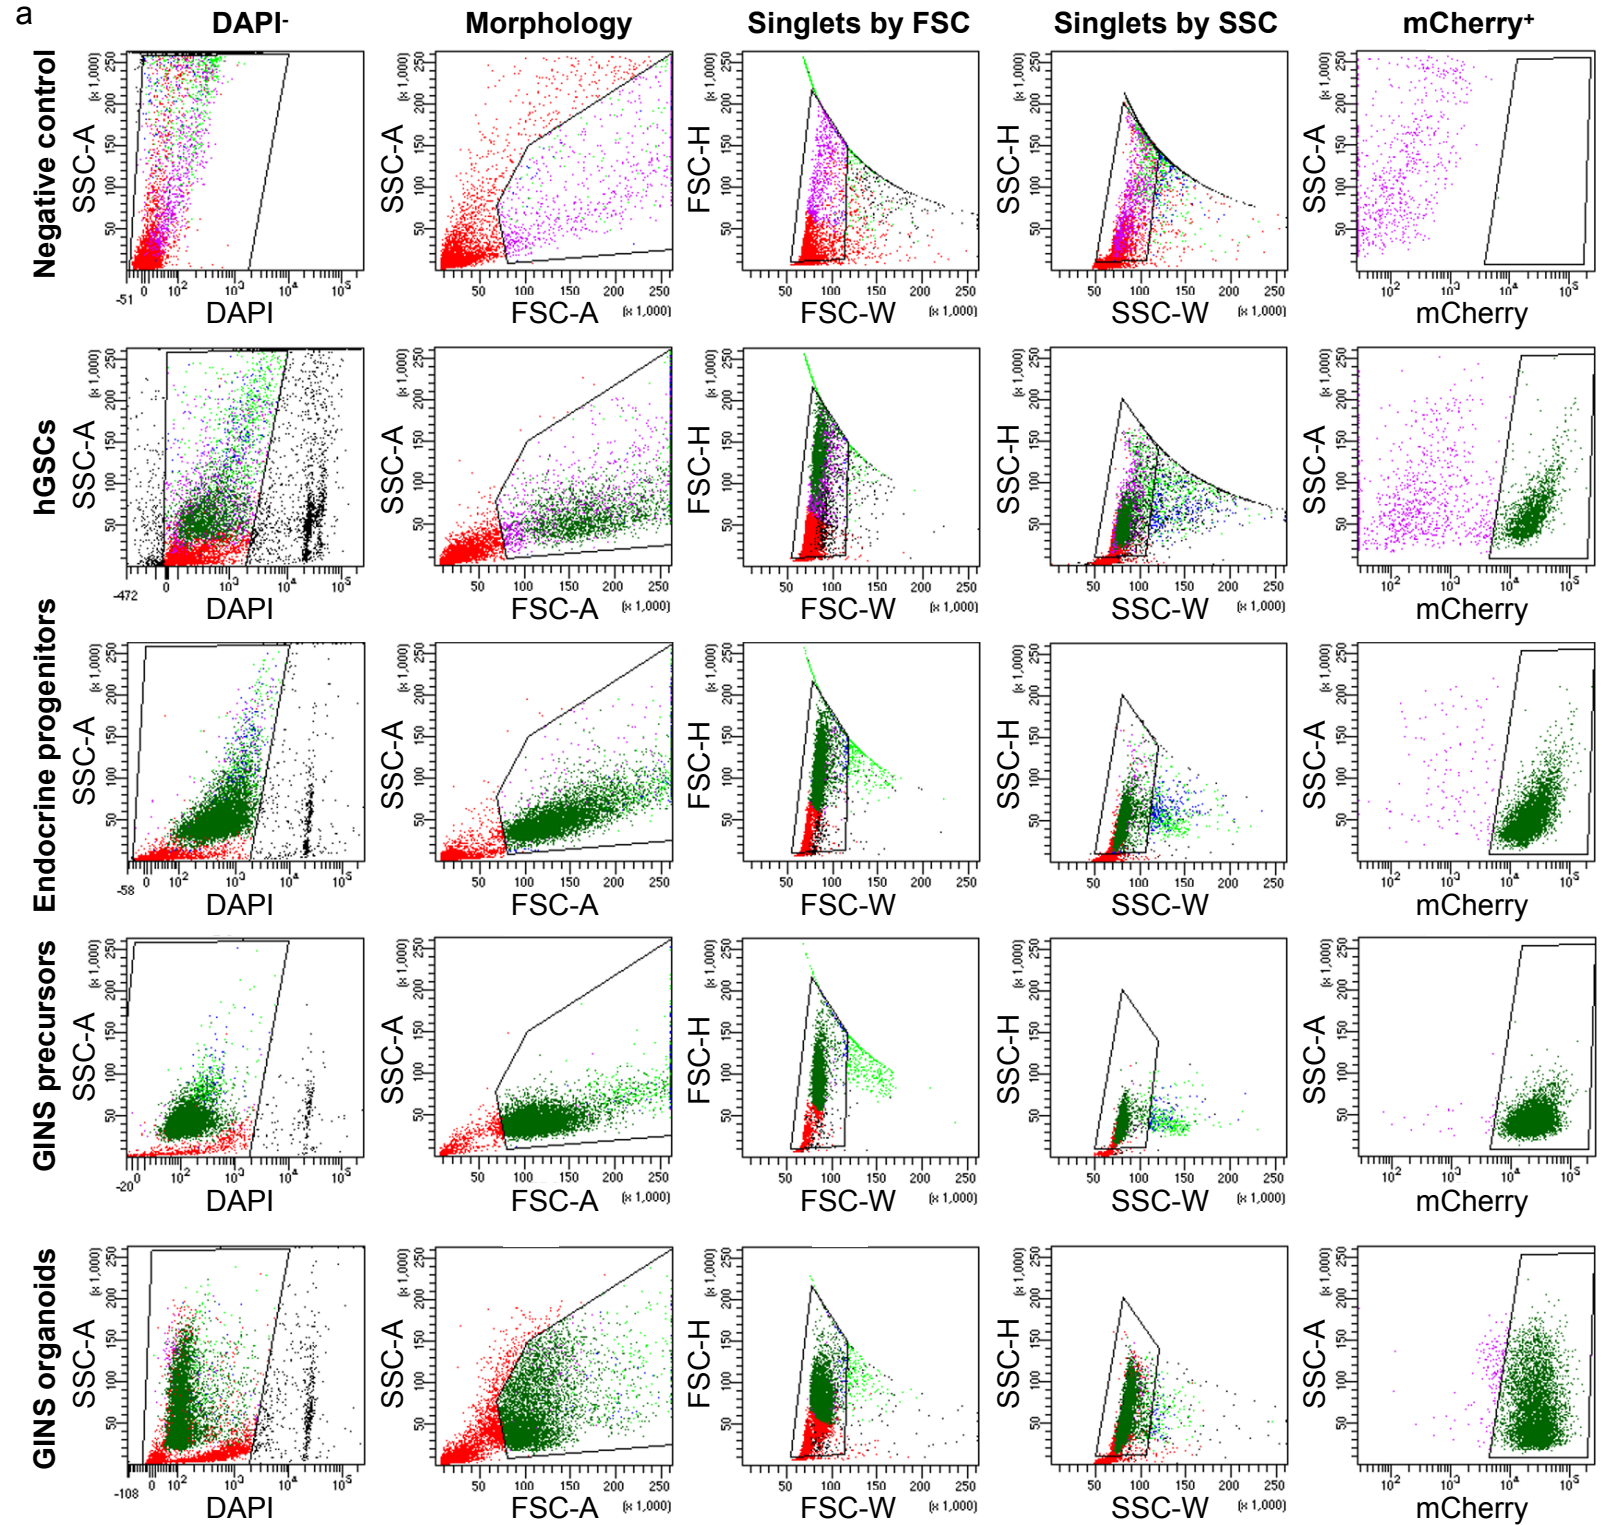

**b**

| hGSC        |         |        | Endocrine progenitors |         |        |
|-------------|---------|--------|-----------------------|---------|--------|
| Population  | %Parent | %Total | Population            | %Parent | %Total |
| All Events  | ####    | 100.0  | All Events            | ####    | 100.0  |
| Live        | 77.4    | 77.4   | Live                  | 94.8    | 94.8   |
| Morphology  | 47.3    | 36.6   | Morphology            | 73.9    | 70.0   |
| Singlet FSC | 83.9    | 30.7   | Singlet FSC           | 95.1    | 66.6   |
| Singlet SSC | 92.7    | 28.5   | Singlet SSC           | 96.8    | 64.4   |
| mCherry+    | 67.6    | 19.3   | mCherry+              | 98.0    | 63.1   |

  

| GINS precursors |         |        | GINS organoids |         |        |
|-----------------|---------|--------|----------------|---------|--------|
| Population      | %Parent | %Total | Population     | %Parent | %Total |
| All Events      | ####    | 100.0  | All Events     | ####    | 100.0  |
| Live            | 98.0    | 98.0   | Live           | 94.1    | 94.1   |
| Morphology      | 91.7    | 89.9   | Morphology     | 56.2    | 52.9   |
| Singlet FSC     | 96.5    | 86.8   | Singlet FSC    | 97.0    | 51.3   |
| Singlet SSC     | 99.0    | 85.9   | Singlet SSC    | 99.1    | 50.8   |
| mCherry+        | 99.7    | 85.6   | mCherry+       | 97.2    | 49.4   |

**Supplementary Fig. 3 | Flow cytometry gating strategy for hGSCs, endocrine progenitors, GINS precursors and GINS organoids. a, Sorting for mCherry<sup>+</sup>DAPI<sup>-</sup> cells. b, Percentage of cell populations.**

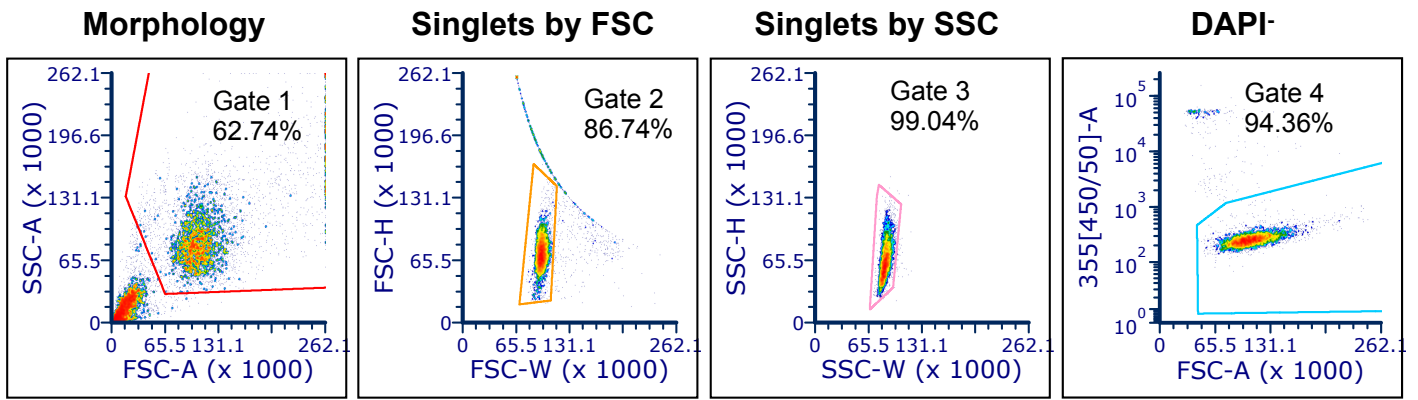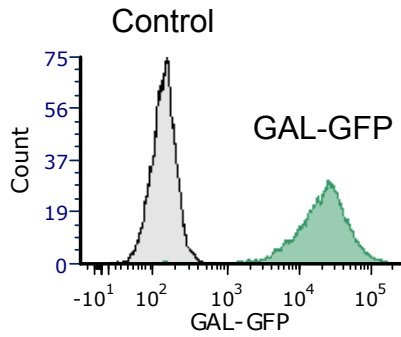

**Supplementary Fig. 4 | Flow cytometry gating strategy for GINS organoids with GAL-GFP reporter.**
